# Supplementary material for: Collisions of Cortical Microtubules with Membrane Associated Myosin VIII Tail
Source: MDPI journal article supplement (doi:10.3390/cells11010145), 2022-01-03
Supplement: s1 [file s1]

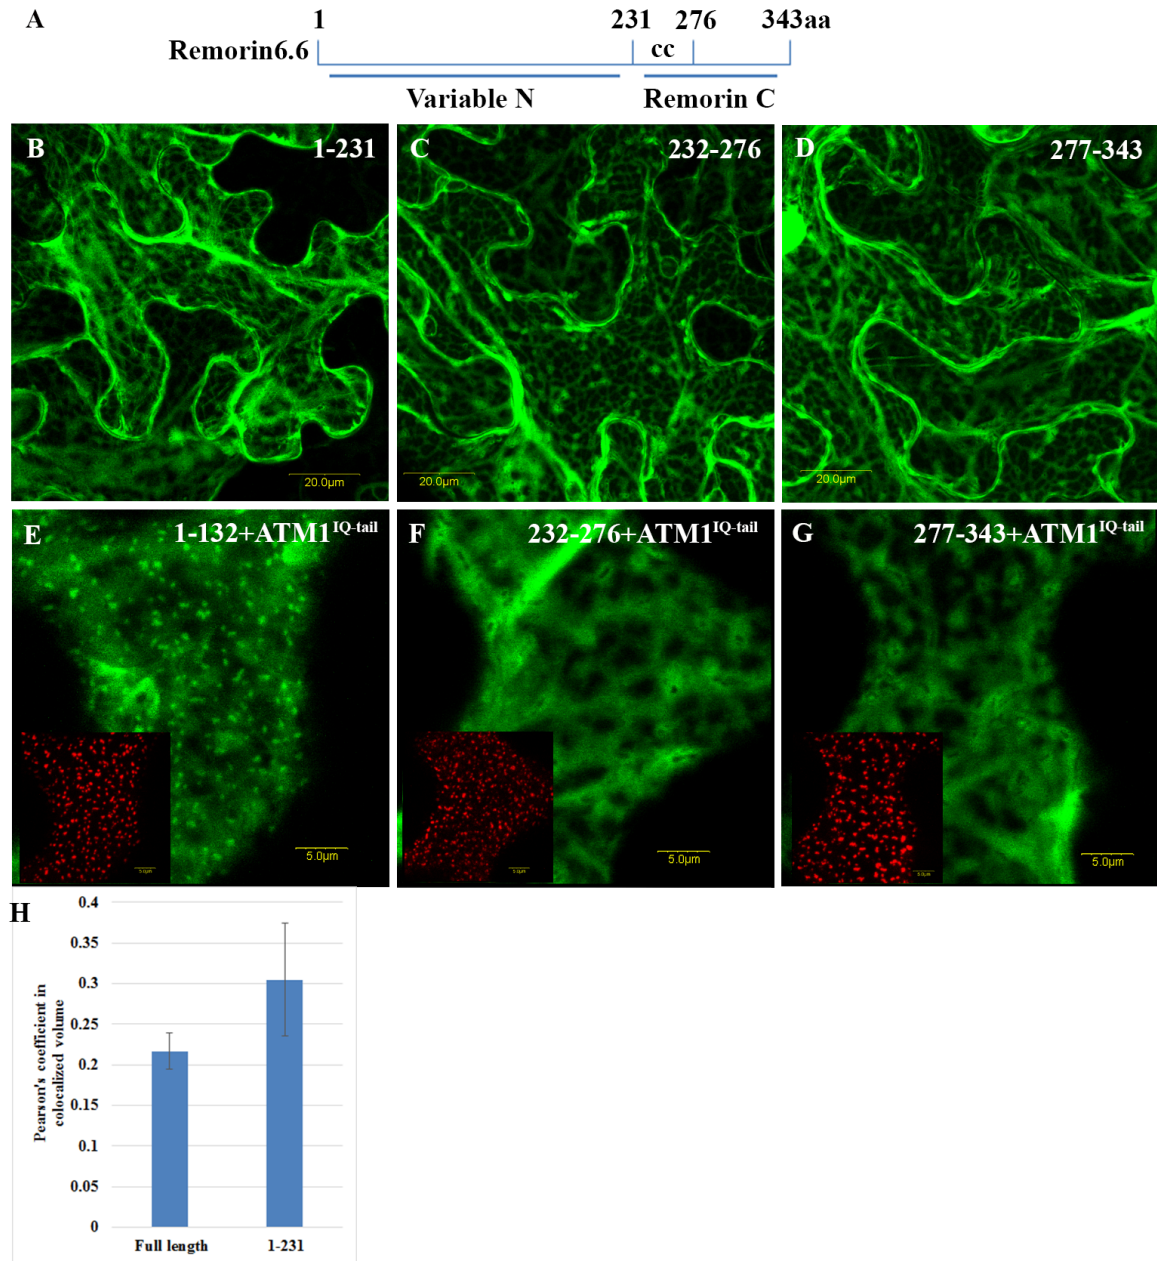

**Figure S1.** The interaction between ATM1<sup>IQ-tail</sup> and remorin 6.6. **(A)** a scheme showing the fragments of remorin 6.6. **(B–D)**. The expression of these fragments fused to GFP. **(E–G)**. Coexpression with mCherry-ATM1<sup>IQ-tail</sup> showing the recruitment of remorin 6.6<sup>1-231</sup> to the plasma membrane by mCherry-ATM1<sup>IQ-tail</sup>. **(H)**. Pearson coefficient analysis confirms the colocalization of GFP-remorin 6.6<sup>1-231</sup> compared to the full length remorin6.6 with mCherry-ATM1<sup>IQ-tail</sup>.
