# Supplementary material for: Collisions of Cortical Microtubules with Membrane Associated Myosin VIII Tail
Source: Cells. 2022 Jan 3;11(1):145. doi: 10.3390/cells11010145 (PMC8750215; doi:10.3390/cells11010145)
Supplement: Supplementary file 1 [file cells-11-00145-s001.zip]

Archive with 11 entries (10 files):
- cells-1518804-SM/
- cells-1518804-SM/Figure S1.pdf
- cells-1518804-SM/movie S1.mov
- cells-1518804-SM/movie S2 .mov
- cells-1518804-SM/movie S4.mp4
- cells-1518804-SM/movie S5.mov
- cells-1518804-SM/movie S6.mov
- cells-1518804-SM/movie S7.mov
- cells-1518804-SM/movie S8.mov
- cells-1518804-SM/movie S9.gif
- cells-1518804-SM/new movie S3.mov
